# Supplementary material
Source: Springer Nature journal article supplement (https://www.springermedizin.de/resource/supplementary/12880_2009_75_MOESM1_ESM.pdf/9450490)

a)

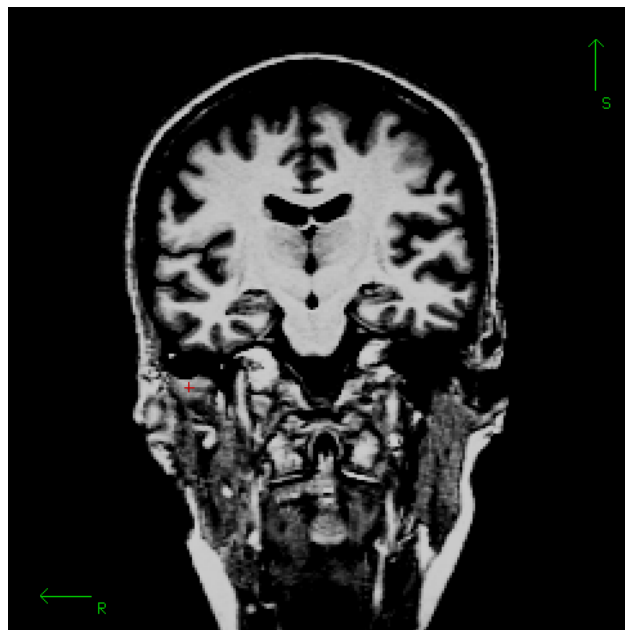

b)

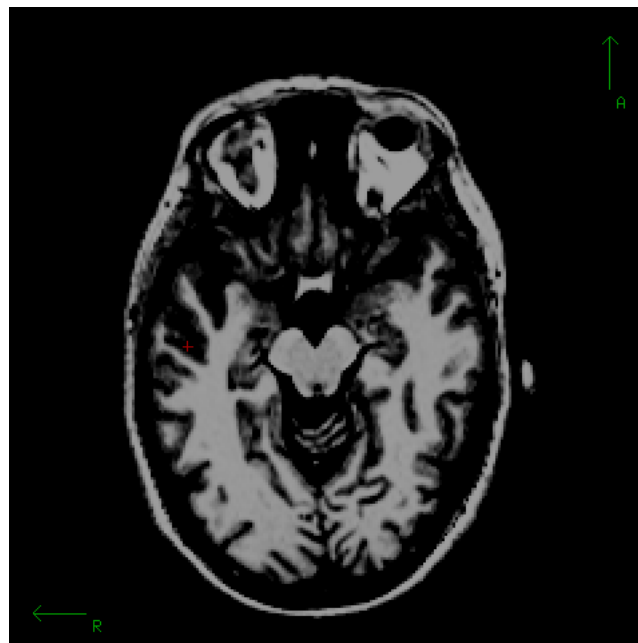

c)

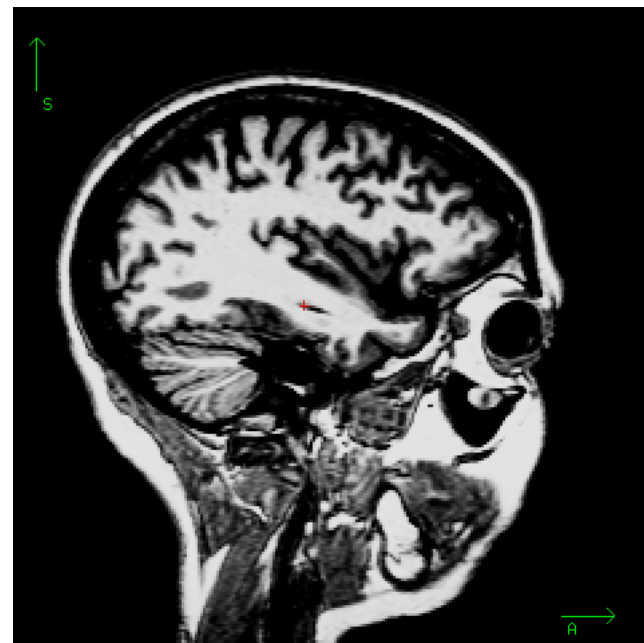

d)

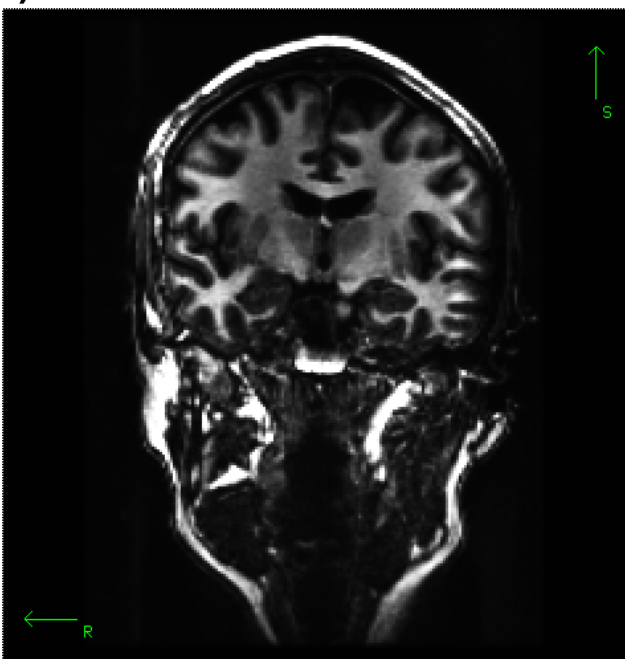

e)

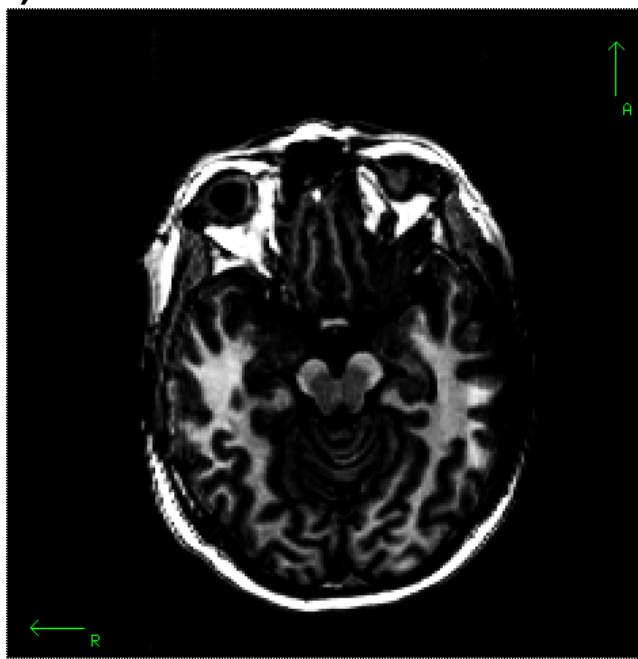

f)

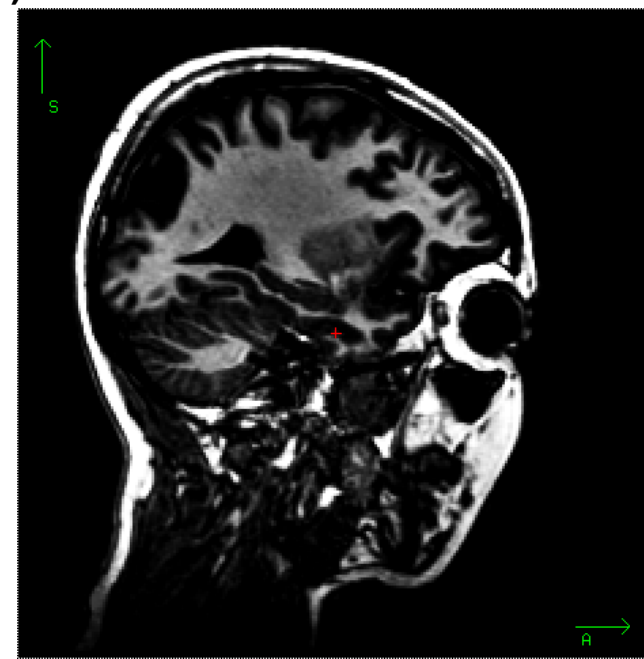

g)

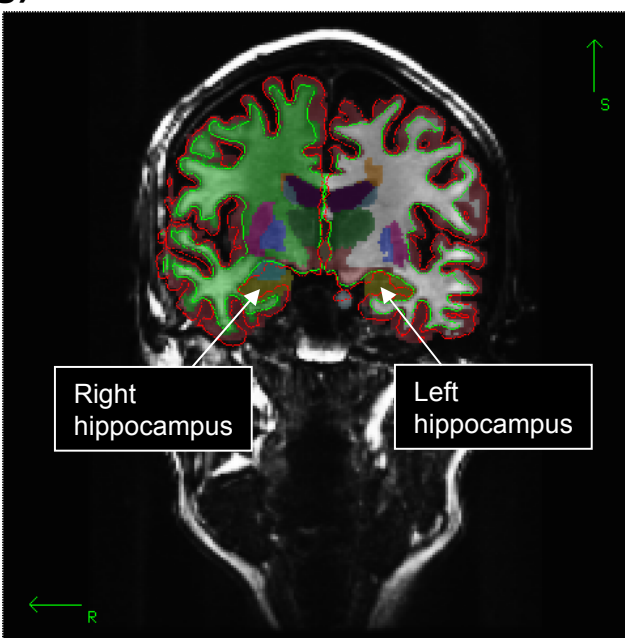

h)

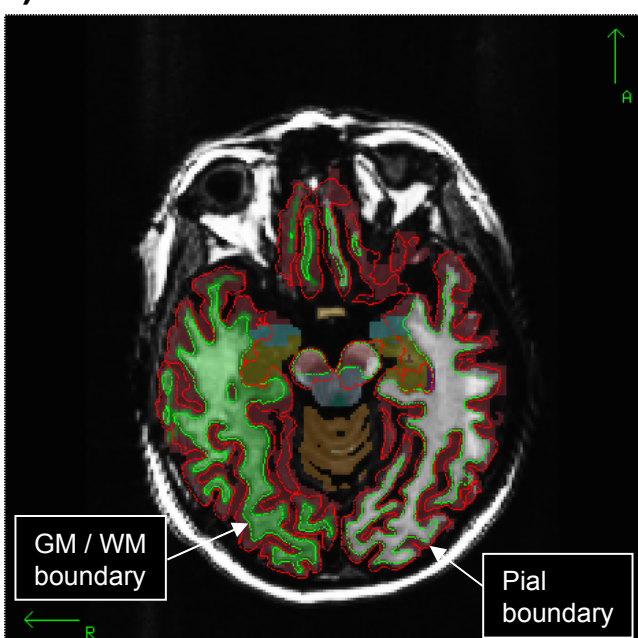

i)

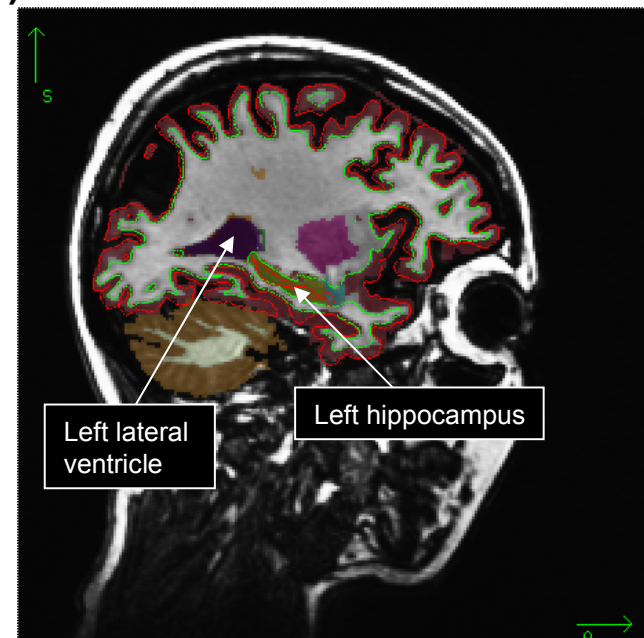

Supplement: MOESM1 [file 9450490]
